# Supplementary material for: Reproductive Biology and Ecology of the Green Mussel Perna viridis: A Multidisciplinary Approach
Source: PubMed Central journal article supplement (PMC6955735; doi:10.3390/biology8040088), 2019-11-15
Supplement: biology-08-00088-s001.pdf [file biology-08-00088-s001.pdf]

# Reproductive biology and ecology of the green mussel *Perna viridis*: A multidisciplinary approach

Supplementary Material

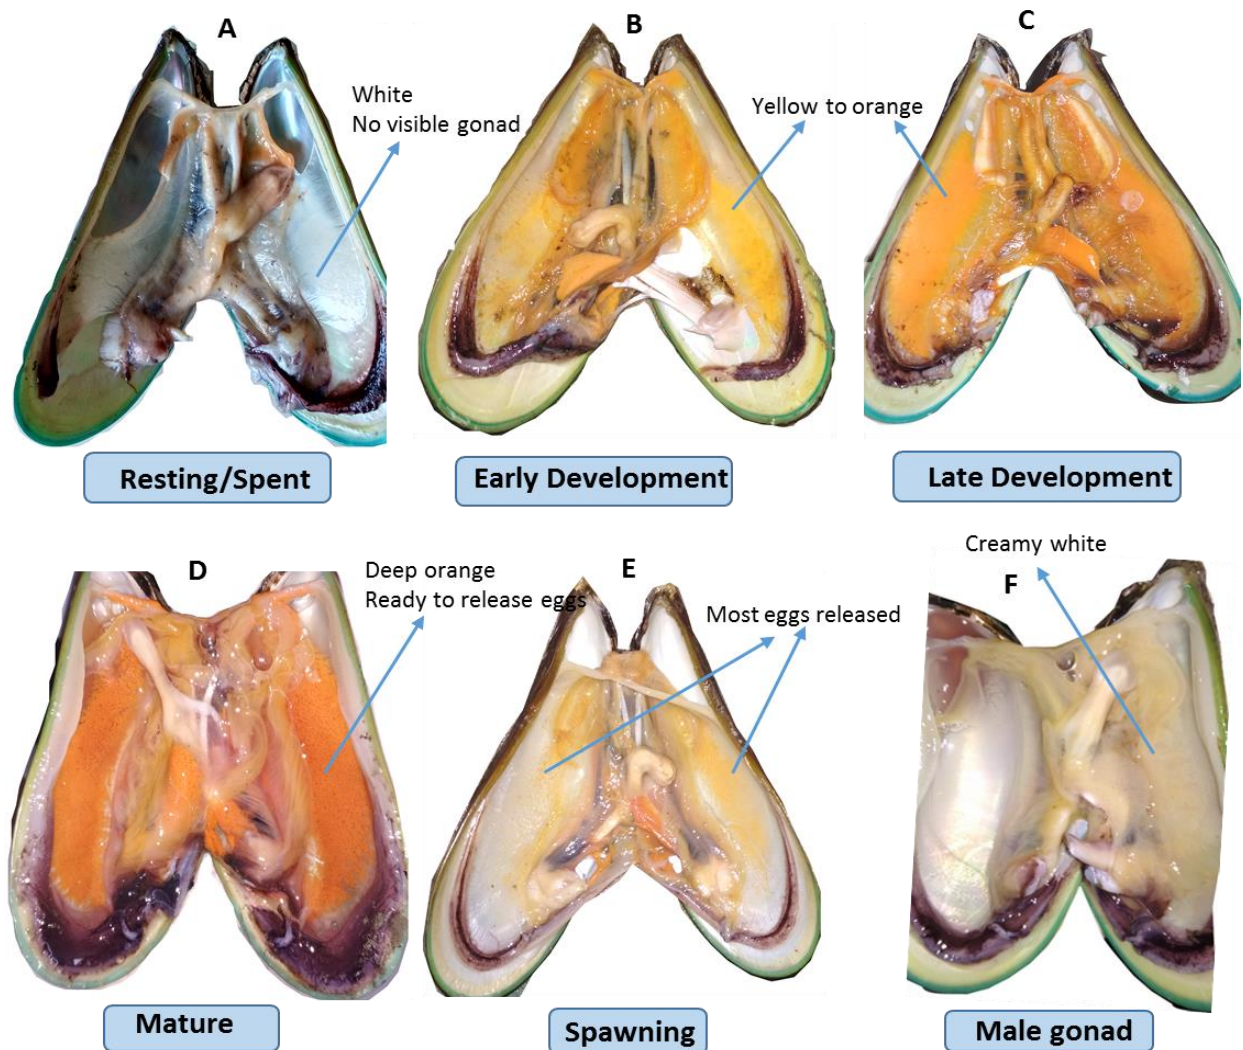

**Figure S1.** Macroscopic temporal variation of gonad development of green mussel *Perna viridis* collected from the coastal waters of Bangladesh. Female gonads color varied from white (resting) to yellow (early developmental) to deep orange (mature) stage. Males gonads are creamy white color during development stages but pictorial views are difficult to separate at different gonad development stage

**Table S1.** Annual variation of water quality parameters of the green mussel *Perna viridis* collection sites during November 2017 to October 2018.

| Water Parameters               | Annual variation        |                          |                          |                          |                         |                         |                          |                          |                          |                          |                          |                          | F-value | Sig. P-Value |
|--------------------------------|-------------------------|--------------------------|--------------------------|--------------------------|-------------------------|-------------------------|--------------------------|--------------------------|--------------------------|--------------------------|--------------------------|--------------------------|---------|--------------|
|                                | Jan                     | Feb                      | Mar                      | Apr                      | May                     | Jun                     | Jul                      | Aug                      | Sep                      | Oct                      | Nov                      | Dec                      |         |              |
| Water depth (m)                | 6.4±0.06 <sup>d</sup>   | 7.0±0.06 <sup>f</sup>    | 7.3±0.06 <sup>g</sup>    | 7.6±0.06 <sup>h</sup>    | 5.6±0.06 <sup>b</sup>   | 5.4±0.02 <sup>ab</sup>  | 7.1±0.10 <sup>fg</sup>   | 6.8±0.01 <sup>e</sup>    | 6.5±0.02 <sup>d</sup>    | 5.2±0.12 <sup>a</sup>    | 6.1±0.06 <sup>c</sup>    | 6.1±0.09 <sup>c</sup>    | 387.81  | 0.000***     |
| Temp. (°C)                     | 24.5±0.21 <sup>c</sup>  | 25.5±0.25 <sup>d</sup>   | 26.3±0.11 <sup>e</sup>   | 27.1±0.15 <sup>f</sup>   | 29.4±0.06 <sup>h</sup>  | 29.7±0.11 <sup>h</sup>  | 30.8±0.06 <sup>i</sup>   | 32.6±0.20 <sup>g</sup>   | 31.8±0.06 <sup>k</sup>   | 28.3±0.11 <sup>e</sup>   | 23.3±0.12 <sup>b</sup>   | 22.2±0.06 <sup>a</sup>   | 1727.89 | 0.000***     |
| Curr speed (m/s)               | 0.35±0.01 <sup>ab</sup> | 0.30±0.02 <sup>a</sup>   | 0.35±0.03 <sup>ab</sup>  | 0.35±0.02 <sup>ab</sup>  | 0.45±0.03 <sup>d</sup>  | 0.49±0.02 <sup>de</sup> | 0.67±0.02 <sup>f</sup>   | 0.83±0.02 <sup>g</sup>   | 0.68±0.01 <sup>f</sup>   | 0.54±0.02 <sup>e</sup>   | 0.44±0.03 <sup>cd</sup>  | 0.37±0.01 <sup>bc</sup>  | 178.21  | 0.000***     |
| Transparency(cm)               | 43.9±1.4 <sup>abc</sup> | 51.6±2.4 <sup>cde</sup>  | 53.2±1.1 <sup>de</sup>   | 51.5±4.7 <sup>cde</sup>  | 66.7±4.8 <sup>g</sup>   | 63.7±5.02 <sup>fg</sup> | 42.5±3.70 <sup>ab</sup>  | 53.2±1.11 <sup>de</sup>  | 56.6±1.64 <sup>ef</sup>  | 37.9±1.94 <sup>a</sup>   | 46.4±1.9 <sup>abcd</sup> | 49.9±2.1 <sup>bcd</sup>  | 22.93   | 0.000***     |
| pH                             | 7.45±0.02 <sup>e</sup>  | 6.86±0.01 <sup>b</sup>   | 6.93±0.01 <sup>b</sup>   | 7.09±0.01 <sup>c</sup>   | 7.43±0.01 <sup>e</sup>  | 6.72±0.01 <sup>a</sup>  | 7.09±0.01 <sup>e</sup>   | 7.15±0.01 <sup>cd</sup>  | 7.20±0.01 <sup>d</sup>   | 6.92±0.01 <sup>b</sup>   | 7.67±0.10 <sup>f</sup>   | 7.18±0.01 <sup>cd</sup>  | 235.03  | 0.000***     |
| DO (ppm)                       | 7.57±0.32 <sup>d</sup>  | 7.66±0.13 <sup>d</sup>   | 6.86±0.35 <sup>c</sup>   | 6.90±0.10 <sup>c</sup>   | 6.80±0.10 <sup>c</sup>  | 6.23±0.10 <sup>a</sup>  | 6.32±0.01 <sup>ab</sup>  | 6.6±0.01 <sup>abc</sup>  | 6.25±0.01 <sup>ab</sup>  | 6.80±0.01 <sup>c</sup>   | 6.70±0.10 <sup>bc</sup>  | 6.90±0.10 <sup>c</sup>   | 25.29   | 0.000***     |
| Salinity (ppt)                 | 33.6±0.37 <sup>k</sup>  | 33.6±0.20 <sup>k</sup>   | 33.3±0.17 <sup>jk</sup>  | 32.0±0.21 <sup>gh</sup>  | 31.5±0.26 <sup>g</sup>  | 28.7±0.12 <sup>e</sup>  | 27.6±0.20 <sup>d</sup>   | 18.6±0.20 <sup>b</sup>   | 22.6±0.20 <sup>b</sup>   | 26.6±0.20 <sup>c</sup>   | 30.2±0.40 <sup>f</sup>   | 32.6±0.15 <sup>ij</sup>  | 1185.02 | 0.000***     |
| Alkalinity (ppm)               | 135±6.2                 | 135±12.2                 | 138±13.2                 | 134±20.5                 | 135±11.4                | 132±16.8                | 141±20.1                 | 136±17.5                 | 129±15.5                 | 124±21.1                 | 135±8.9                  | 137±25.4                 | 0.19    | 0.996NS      |
| NO <sub>3</sub> -N (ppm)       | 0.52±0.04 <sup>d</sup>  | 0.41±0.04 <sup>cd</sup>  | 0.37±0.05 <sup>bcd</sup> | 0.27±0.05 <sup>abc</sup> | 0.23±0.04 <sup>ab</sup> | 0.15±0.03 <sup>a</sup>  | 0.37±0.05 <sup>bcd</sup> | 0.38±0.04 <sup>bcd</sup> | 0.73±0.10 <sup>e</sup>   | 0.51±0.06 <sup>d</sup>   | 0.45±0.03 <sup>d</sup>   | 0.47±0.09 <sup>d</sup>   | 0.24    | 0.000***     |
| PO <sub>4</sub> -P (ppm)       | 1.34±0.04 <sup>de</sup> | 1.07±0.04 <sup>bcd</sup> | 0.84±0.15 <sup>ab</sup>  | 0.97±0.1 <sup>abcd</sup> | 0.73±0.13 <sup>ab</sup> | 0.68±0.09 <sup>a</sup>  | 1.29±0.20 <sup>de</sup>  | 0.89±0.08 <sup>abc</sup> | 0.73±0.06 <sup>ab</sup>  | 1.76±0.11 <sup>f</sup>   | 1.47±0.16 <sup>ef</sup>  | 1.24±0.23 <sup>cde</sup> | 21.80   | 0.000***     |
| NH <sub>3</sub> -N (ppm)       | 0.26±0.02 <sup>de</sup> | 0.24±0.03 <sup>cd</sup>  | 0.21±0.03 <sup>bcd</sup> | 0.24±0.01 <sup>cd</sup>  | 0.19±0.02 <sup>bc</sup> | 0.32±0.01 <sup>f</sup>  | 0.31±0.01 <sup>ef</sup>  | 0.31±0.01 <sup>ef</sup>  | 0.21±0.01 <sup>bcd</sup> | 0.23±0.01 <sup>bcd</sup> | 0.12±0.01 <sup>a</sup>   | 0.18±0.01 <sup>b</sup>   | 32.13   | 0.000***     |
| NH <sub>4</sub> -N (ppm)       | 0.12±0.01               | 0.09±0.01                | 0.33±0.41                | 0.09±0.01                | 0.09±0.01               | 0.08±0.01               | 0.07±0.01                | 0.09±0.01                | 0.09±0.01                | 0.14±0.02                | 0.1±0.02                 | 0.09±0.01                | 1.06    | 0.429 NS     |
| Chlo-a (µg/L)                  | 6.92±0.17 <sup>fg</sup> | 5.81±0.24 <sup>cde</sup> | 5.21±0.08 <sup>bcd</sup> | 4.91±0.65 <sup>abc</sup> | 4.32±0.49 <sup>ab</sup> | 4.01±0.22 <sup>a</sup>  | 7.42±0.47 <sup>gh</sup>  | 5.33±0.09 <sup>bcd</sup> | 4.55±0.28 <sup>ab</sup>  | 8.17±0.37 <sup>h</sup>   | 6.57±0.29 <sup>efg</sup> | 5.98±0.36 <sup>def</sup> | 40.88   | 0.000***     |
| Plankton (×10 <sup>3</sup> /L) | 70.6±3.51 <sup>fg</sup> | 58.6±3.52 <sup>cde</sup> | 53.7±2.52 <sup>bcd</sup> | 48.3±5.15 <sup>abc</sup> | 43.6±3.78 <sup>ab</sup> | 41.7±3.51 <sup>a</sup>  | 76.0±5.29 <sup>gh</sup>  | 54.0±2.01 <sup>bcd</sup> | 48.0±3.01 <sup>ab</sup>  | 88.7±3.05 <sup>h</sup>   | 68.0±4.0 <sup>efg</sup>  | 63.0±1.73 <sup>def</sup> | 49.04   | 0.000***     |

Values are mean ± SD of triplicate measurements for each months based on the repeated measures ANOVA. The mean values followed by the different superscript letter in each parameter indicate significant difference at 0.05. If the effects were significant, ANOVA was followed by Tukey test. P-values are given while significance levels are denoted by asterisks (\*<0.05; \*\*<0.01; \*\*\*<0.001; NS-not significant).

**Table S2.** Annual variation of the major groups of ingested plankton (absolute abundance) in the whole gut of the green mussel *Perna viridis*

| Gut Plankton Groups                 | Annual variation               |                               |                                |                                 |                                |                               |                               |                                |                               |                               |                               |                                | F-value | Sig. level<br>P-Value |
|-------------------------------------|--------------------------------|-------------------------------|--------------------------------|---------------------------------|--------------------------------|-------------------------------|-------------------------------|--------------------------------|-------------------------------|-------------------------------|-------------------------------|--------------------------------|---------|-----------------------|
|                                     | Jan                            | Feb                           | Mar                            | Apr                             | May                            | Jun                           | Jul                           | Aug                            | Sep                           | Oct                           | Nov                           | Dec                            |         |                       |
| Bacillariophyceae ( $\times 10^4$ ) | 24.67 $\pm$ 9.7 <sup>de</sup>  | 23.7 $\pm$ 7.3 <sup>d</sup>   | 22.0 $\pm$ 0.005 <sup>cd</sup> | 16.86 $\pm$ 4.9 <sup>b</sup>    | 10.27 $\pm$ 3.2 <sup>a</sup>   | 15.6 $\pm$ 8.2 <sup>b</sup>   | 16.6 $\pm$ 9.4 <sup>b</sup>   | 18.4 $\pm$ 8.2 <sup>b</sup>    | 22.8 $\pm$ 3.5 <sup>cd</sup>  | 35.7 $\pm$ 2.3 <sup>e</sup>   | 38.6 $\pm$ 9.02 <sup>f</sup>  | 28.1 $\pm$ 2.45 <sup>e</sup>   | 115.89  | 0.000***              |
| Chlorophyceae ( $\times 10^4$ )     | 1.47 $\pm$ 1.4 <sup>abc</sup>  | 1.40 $\pm$ 1.1 <sup>abc</sup> | 1.9 $\pm$ 1.3 <sup>c</sup>     | 0.76 $\pm$ 1.4 <sup>abc</sup>   | 1.55 $\pm$ 1.4 <sup>abc</sup>  | 1.1 $\pm$ 1.4 <sup>abc</sup>  | 0.5 $\pm$ 0.8 <sup>ab</sup>   | 1.8 $\pm$ 1.3 <sup>bc</sup>    | 0.9 $\pm$ 1.2 <sup>abc</sup>  | 0.48 $\pm$ 0.87 <sup>a</sup>  | 0.5 $\pm$ 1.2 <sup>ab</sup>   | 0.84 $\pm$ 1.2 <sup>abc</sup>  | 3.47    | 0.000***              |
| Cyanophyceae ( $\times 10^4$ )      | 2.8 $\pm$ 2.6 <sup>ab</sup>    | 4.1 $\pm$ 2.6 <sup>ab</sup>   | 4.82 $\pm$ 2.81 <sup>ab</sup>  | 2.48 $\pm$ 2.75 <sup>ab</sup>   | 3.09 $\pm$ 2.74 <sup>ab</sup>  | 2.7 $\pm$ 2.85 <sup>ab</sup>  | 1.5 $\pm$ 1.93 <sup>a</sup>   | 5.5 $\pm$ 5.46 <sup>b</sup>    | 3.8 $\pm$ 7.28 <sup>ab</sup>  | 2.19 $\pm$ 2.18 <sup>ab</sup> | 1.7 $\pm$ 2.54 <sup>a</sup>   | 2.84 $\pm$ 2.77 <sup>ab</sup>  | 2.40    | 0.008**               |
| Dinophyceae ( $\times 10^4$ )       | 2.4 $\pm$ 1.72 <sup>bc</sup>   | 2.2 $\pm$ 1.45 <sup>abc</sup> | 2.91 $\pm$ 1.48 <sup>c</sup>   | 1.15 $\pm$ 1.49 <sup>ab</sup>   | 1.73 $\pm$ 1.67 <sup>abc</sup> | 1.9 $\pm$ 1.77 <sup>abc</sup> | 0.6 $\pm$ 1.47 <sup>a</sup>   | 0.8 $\pm$ 1.64 <sup>ab</sup>   | 1.5 $\pm$ 1.57 <sup>abc</sup> | 0.86 $\pm$ 1.74 <sup>ab</sup> | 1.4 $\pm$ 1.96 <sup>abc</sup> | 2.42 $\pm$ 1.43 <sup>bc</sup>  | 4.12    | 0.000***              |
| Pyrrophyceae                        | 0.93 $\pm$ 1.28 <sup>a</sup>   | 2.0 $\pm$ 2.25 <sup>ab</sup>  | 1.55 $\pm$ 1.63 <sup>ab</sup>  | 2.09 $\pm$ 2.79 <sup>ab</sup>   | 1.18 $\pm$ 1.59 <sup>ab</sup>  | 0.6 $\pm$ 1.47 <sup>a</sup>   | 1.0 $\pm$ 1.99 <sup>a</sup>   | 2.1 $\pm$ 1.65 <sup>ab</sup>   | 1.8 $\pm$ 2.14 <sup>ab</sup>  | 3.24 $\pm$ 4.12 <sup>ab</sup> | 3.9 $\pm$ 4.18 <sup>b</sup>   | 3.26 $\pm$ 4.17 <sup>ab</sup>  | 2.95    | 0.001***              |
| Phytoplankton ( $\times 10^4$ )     | 32.27 $\pm$ 4.65 <sup>cd</sup> | 33.4 $\pm$ 5.15 <sup>cd</sup> | 33.18 $\pm$ 4.69 <sup>cd</sup> | 23.33 $\pm$ 7.7 <sup>ab</sup>   | 17.82 $\pm$ 6.64 <sup>a</sup>  | 21.9 $\pm$ 4.28 <sup>ab</sup> | 20.2 $\pm$ 5.15 <sup>a</sup>  | 28.6 $\pm$ 6.46 <sup>bc</sup>  | 30.8 $\pm$ 10.0 <sup>cd</sup> | 42.5 $\pm$ 5.51 <sup>ef</sup> | 46.1 $\pm$ 10.18 <sup>f</sup> | 37.47 $\pm$ 6.14 <sup>de</sup> | 35.53   | 0.000***              |
| Zooplankton ( $\times 10^4$ )       | 4.4 $\pm$ 1.72 <sup>ab</sup>   | 4.6 $\pm$ 4.45 <sup>ab</sup>  | 3.81 $\pm$ 2.54 <sup>ab</sup>  | 3.62 $\pm$ 5.0 <sup>ab</sup>    | 3.55 $\pm$ 2.3 <sup>a</sup>    | 3.0 $\pm$ 2.94 <sup>a</sup>   | 4.3 $\pm$ 3.57 <sup>ab</sup>  | 4.3 $\pm$ 1.75 <sup>ab</sup>   | 7.1 $\pm$ 7.75 <sup>ab</sup>  | 7.9 $\pm$ 5.88 <sup>b</sup>   | 6.4 $\pm$ 3.53 <sup>ab</sup>  | 5.16 $\pm$ 3.29 <sup>ab</sup>  | 2.79    | 0.002**               |
| Plankton ( $\times 10^4$ )          | 36.67 $\pm$ 4.82 <sup>cd</sup> | 38.0 $\pm$ 8.49 <sup>d</sup>  | 37.0 $\pm$ 5.68 <sup>d</sup>   | 26.95 $\pm$ 10.9 <sup>abc</sup> | 31.36 $\pm$ 7.23 <sup>a</sup>  | 24.9 $\pm$ 3.86 <sup>ab</sup> | 24.5 $\pm$ 8.28 <sup>ab</sup> | 32.9 $\pm$ 6.63 <sup>bcd</sup> | 37.9 $\pm$ 1.75 <sup>d</sup>  | 50.4 $\pm$ 10.4 <sup>ef</sup> | 52.5 $\pm$ 12.34 <sup>f</sup> | 42.63 $\pm$ 13.3 <sup>de</sup> | 23.14   | 0.000***              |

Values are mean  $\pm$  SD of twenty measurements for each months (n=20) based on the one-way ANOVA. The mean values followed by the different superscript letter in each parameter indicate significant difference at 0.05. If the effects were significant, ANOVA was followed by Tukey test. P-values were given while significance levels are denoted by asterisks (\*<0.05; \*\*<0.01; \*\*\*<0.001; NS-not significant).

**Table S3.** Abundance of the major groups of ingested plankton in the whole gut at different gonadal development stages of the green mussel *Perna viridis*

| Gut Plankton Group                  | Gonadal Development Stages    |                               |                               |                               |                               | F-values | Sig. Level<br>P value |
|-------------------------------------|-------------------------------|-------------------------------|-------------------------------|-------------------------------|-------------------------------|----------|-----------------------|
|                                     | Resting                       | Development                   | Mature                        | Spawning                      | Spent                         |          |                       |
| Bacillariophyceae ( $\times 10^4$ ) | 17.47 $\pm$ 2.04 <sup>b</sup> | 34.5 $\pm$ 6.73 <sup>c</sup>  | 24.54 $\pm$ 0.9 <sup>d</sup>  | 22.18 $\pm$ 0.58 <sup>c</sup> | 10.67 $\pm$ 2.84 <sup>a</sup> | 269.44   | 0.000***              |
| Chlorophyceae ( $\times 10^4$ )     | 1.22 $\pm$ 1.3 <sup>ab</sup>  | 0.7 $\pm$ 1.21 <sup>a</sup>   | 0.97 $\pm$ 1.21 <sup>ab</sup> | 1.59 $\pm$ 1.37 <sup>b</sup>  | 1.2 $\pm$ 1.45 <sup>ab</sup>  | 2.93     | 0.022**               |
| Cyanophyceae ( $\times 10^4$ )      | 3.27 $\pm$ 3.79               | 2.63 $\pm$ 4.66               | 2.86 $\pm$ 2.24               | 4.47 $\pm$ 2.91               | 2.67 $\pm$ 2.84               | 1.64     | 0.166 NS              |
| Dinophyceae ( $\times 10^4$ )       | 1.09 $\pm$ 1.63 <sup>a</sup>  | 1.37 $\pm$ 1.86 <sup>a</sup>  | 2.38 $\pm$ 1.23 <sup>b</sup>  | 2.82 $\pm$ 1.64 <sup>b</sup>  | 1.4 $\pm$ 1.49 <sup>a</sup>   | 9.30     | 0.000***              |
| Pyrrophyceae ( $\times 10^4$ )      | 1.42 $\pm$ 2.05 <sup>a</sup>  | 3.2 $\pm$ 3.95 <sup>b</sup>   | 1.95 $\pm$ 2.65 <sup>ab</sup> | 1.65 $\pm$ 2.23 <sup>ab</sup> | 1.47 $\pm$ 1.48 <sup>a</sup>  | 4.28     | 0.002**               |
| Phytoplankton ( $\times 10^4$ )     | 24.46 $\pm$ 6.39 <sup>b</sup> | 42.4 $\pm$ 9.02 <sup>d</sup>  | 32.7 $\pm$ 4.84 <sup>c</sup>  | 32.71 $\pm$ 5.32 <sup>c</sup> | 17.4 $\pm$ 5.95 <sup>a</sup>  | 91.94    | 0.000***              |
| Zooplankton ( $\times 10^4$ )       | 4.1 $\pm$ 3.5 <sup>a</sup>    | 7.3 $\pm$ 5.88 <sup>b</sup>   | 4.54 $\pm$ 2.61 <sup>a</sup>  | 4.18 $\pm$ 3.86 <sup>a</sup>  | 3.0 $\pm$ 2.33 <sup>a</sup>   | 7.94     | 0.000***              |
| Total Plankton ( $\times 10^4$ )    | 28.56 $\pm$ 8.19 <sup>b</sup> | 49.7 $\pm$ 12.83 <sup>d</sup> | 47.24 $\pm$ 6.7 <sup>c</sup>  | 36.88 $\pm$ 7.53 <sup>c</sup> | 20.4 $\pm$ 6.33 <sup>a</sup>  | 68.77    | 0.000***              |

Values are mean  $\pm$  SD. The mean values followed by the different superscript letter in each parameter indicate significant difference at 0.05. If the effects were significant, ANOVA was followed by Tukey test. P-values were given while significance levels were denoted by asterisks (\* $<$ 0.05; \*\* $<$ 0.01; \*\*\* $<$ 0.001; NS-not significant).

**Table S4.** Annual variation in fatty acid content (% of total fatty acids) at different stages of gonad development of the green mussel *Perna viridis*

| Fatty Acids | Annual variation         |                          |                            |                           |                           |                          |                           |                           |                           |                           |                           |                           | F value | Sig. level<br>P-Value |
|-------------|--------------------------|--------------------------|----------------------------|---------------------------|---------------------------|--------------------------|---------------------------|---------------------------|---------------------------|---------------------------|---------------------------|---------------------------|---------|-----------------------|
|             | Jan                      | Feb                      | Mar                        | Apr                       | May                       | Jun                      | Jul                       | Aug                       | Sep                       | Oct                       | Nov                       | Dec                       |         |                       |
| C14:0       | 3.24±0.26 <sup>ab</sup>  | 3.03±0.16 <sup>ab</sup>  | 3.08±0.31 <sup>ab</sup>    | 3.32±0.48 <sup>ab</sup>   | 3.65±0.29 <sup>b</sup>    | 3.41±0.25 <sup>ab</sup>  | 2.99±0.02 <sup>ab</sup>   | 3.25±0.55 <sup>ab</sup>   | 2.6±0.15 <sup>a</sup>     | 2.96±0.18 <sup>ab</sup>   | 2.96±0.12 <sup>ab</sup>   | 3.15±0.11 <sup>ab</sup>   | 2.701   | 0.02*                 |
| C15:0       | 0.61±0.08                | 0.58±0.07                | 0.69±0.06                  | 0.71±0.11                 | 0.59±0.14                 | 0.61±0.08                | 0.63±0.08                 | 0.51±0.08                 | 0.59±0.05                 | 0.62±0.05                 | 0.60±0.12                 | 0.76±0.05                 | 1.91    | 0.09NS                |
| C16:0       | 25.02±0.19 <sup>d</sup>  | 24.26±0.2 <sup>cd</sup>  | 21.68±3.42 <sup>abcd</sup> | 18.9±3.93 <sup>abcd</sup> | 15.6±1.03 <sup>a</sup>    | 16.57±1.81 <sup>ab</sup> | 17.46±0.67 <sup>abc</sup> | 17.19±1.16 <sup>abc</sup> | 17.45±3.19 <sup>abc</sup> | 19.4±0.52 <sup>abcd</sup> | 21.37±4.1 <sup>abcd</sup> | 23.81±4.17 <sup>bcd</sup> | 4.85    | 0.001***              |
| C17:0       | 0.9±0.07 <sup>a</sup>    | 0.98±0.05 <sup>a</sup>   | 1.10±0.21 <sup>ab</sup>    | 1.31±0.31 <sup>ab</sup>   | 1.44±0.10 <sup>ab</sup>   | 1.29±0.22 <sup>ab</sup>  | 1.15±0.38 <sup>ab</sup>   | 1.77±0.12 <sup>b</sup>    | 1.42±0.5 <sup>ab</sup>    | 1.12±0.16 <sup>ab</sup>   | 1.05±0.03 <sup>a</sup>    | 0.86±0.08 <sup>a</sup>    | 3.74    | 0.003**               |
| C18:0       | 2.43±0.38 <sup>a</sup>   | 2.9±0.3 <sup>ab</sup>    | 3.06±0.44 <sup>ab</sup>    | 3.31±0.33 <sup>abc</sup>  | 3.63±0.04 <sup>abc</sup>  | 3.46±0.73 <sup>abc</sup> | 3.07±0.37 <sup>ab</sup>   | 4.72±0.4 <sup>c</sup>     | 4.06±0.13 <sup>bc</sup>   | 3.62±0.52 <sup>abc</sup>  | 2.95±0.08 <sup>ab</sup>   | 2.35±0.45 <sup>a</sup>    | 4.49    | 0.001***              |
| C20:0       | 0.29±0.06                | 0.34±0.06                | 0.39±0.06                  | 0.39±0.09                 | 0.34±0.07                 | 0.34±0.23                | 0.39±0.02                 | 0.44±0.21                 | 0.28±0.1                  | 0.39±0.09                 | 0.32±0.04                 | 0.36±0.03                 | 0.89    | 0.567NS               |
| C24:0       | 0.4±0.03 <sup>ab</sup>   | 0.36±0.11 <sup>ab</sup>  | 0.29±0.06 <sup>ab</sup>    | 0.31±0.03 <sup>ab</sup>   | 0.28±0.03 <sup>ab</sup>   | 0.38±0.13 <sup>ab</sup>  | 0.30±0.03 <sup>ab</sup>   | 0.34±0.12 <sup>a</sup>    | 0.33±0.08 <sup>ab</sup>   | 0.44±0.11 <sup>ab</sup>   | 0.35±0.1 <sup>ab</sup>    | 0.41±0.11 <sup>ab</sup>   | 1.02    | 0.458NS               |
| Total SFAs  | 32.9±0.2 <sup>d</sup>    | 32.45±0.1 <sup>cd</sup>  | 30.3±2.5 <sup>abcd</sup>   | 28.24±2.9 <sup>abcd</sup> | 25.56±0.69 <sup>a</sup>   | 26.06±0.9 <sup>ab</sup>  | 26.0±0.28 <sup>ab</sup>   | 28.2±0.95 <sup>abcd</sup> | 26.7±1.72 <sup>abc</sup>  | 28.55±0.1 <sup>abcd</sup> | 29.59±3.9 <sup>abcd</sup> | 31.7±3.66 <sup>bcd</sup>  | 4.90    | 0.001***              |
| C14:1       | 0.24±0.07                | 0.31±0.06                | 0.25±0.06                  | 0.39±0.06                 | 0.34±0.03                 | 0.32±0.12                | 0.4±0.1                   | 0.32±0.07                 | 0.3±0.1                   | 0.25±0.02                 | 0.3±0.02                  | 0.24±0.07                 | 1.68    | 0.141NS               |
| C16:1       | 10.07±0.43 <sup>a</sup>  | 9.98±0.21 <sup>a</sup>   | 12.29±3.51 <sup>abc</sup>  | 13.4±3.09 <sup>abc</sup>  | 15.86±0.8 <sup>bc</sup>   | 16.27±0.59 <sup>c</sup>  | 16.19±0.77 <sup>c</sup>   | 16.33±0.06 <sup>c</sup>   | 14.54±2.4 <sup>abc</sup>  | 11.42±0.27 <sup>ab</sup>  | 10.64±0.62 <sup>a</sup>   | 10.39±0.57 <sup>a</sup>   | 8.13    | 0.000***              |
| C17:1       | 2.15±0.41                | 2.61±0.13                | 2.94±0.44                  | 2.89±0.28                 | 3.17±0.15                 | 2.74±0.48                | 2.8±0.42                  | 3.15±0.17                 | 2.89±0.67                 | 2.22±0.16                 | 2.51±0.21                 | 2.35±0.41                 | 2.55    | 0.076NS               |
| C18:1n-9    | 3.22±0.00 <sup>a</sup>   | 4.15±0.46 <sup>abc</sup> | 4.08±1.58 <sup>abc</sup>   | 4.75±1.34 <sup>abc</sup>  | 5.55±0.39 <sup>abc</sup>  | 6.28±0.86 <sup>c</sup>   | 5.84±0.3 <sup>bc</sup>    | 5.68±0.33 <sup>bc</sup>   | 4.87±1.01 <sup>abc</sup>  | 4.11±0.25 <sup>abc</sup>  | 4.34±0.63 <sup>abc</sup>  | 3.84±0.92 <sup>ab</sup>   | 3.97    | 0.002**               |
| C18:1n-7    | 2.1±0.21 <sup>ab</sup>   | 2.39±0.31 <sup>abc</sup> | 2.69±0.22 <sup>bc</sup>    | 2.54±0.22 <sup>abc</sup>  | 2.59±0.22 <sup>abc</sup>  | 2.82±0.17 <sup>c</sup>   | 2.92±0.19 <sup>c</sup>    | 2.77±0.15 <sup>bc</sup>   | 2.55±0.34 <sup>abc</sup>  | 1.9±0.11 <sup>a</sup>     | 2.25±0.22 <sup>abc</sup>  | 2.1±0.33 <sup>ab</sup>    | 5.64    | 0.000***              |
| C20:1n-9    | 1.9±0.36 <sup>a</sup>    | 2.8±0.31 <sup>ab</sup>   | 1.74±0.35 <sup>a</sup>     | 2.54±0.64 <sup>ab</sup>   | 2.41±0.14 <sup>ab</sup>   | 2.98±0.42 <sup>b</sup>   | 3.06±0.44 <sup>b</sup>    | 2.32±0.14 <sup>ab</sup>   | 2.41±0.19 <sup>ab</sup>   | 1.9±0.18 <sup>a</sup>     | 2.18±0.27 <sup>ab</sup>   | 1.89±0.36 <sup>a</sup>    | 4.49    | 0.001***              |
| Total MUFAs | 19.7±0.05 <sup>a</sup>   | 21.5±0.14 <sup>ab</sup>  | 23.99±4.75 <sup>abc</sup>  | 26.5±4.76 <sup>abcd</sup> | 29.93±1.67 <sup>cd</sup>  | 31.43±0.06 <sup>d</sup>  | 31.21±0.13 <sup>cd</sup>  | 30.57±0.34 <sup>cd</sup>  | 27.55±4.4 <sup>bcd</sup>  | 21.83±0.14 <sup>ab</sup>  | 22.23±0.84 <sup>ab</sup>  | 20.82±0.149 <sup>ab</sup> | 9.66    | 0.000***              |
| C18:3n-3    | 2.0±0.55                 | 1.65±0.43                | 2.25±0.15                  | 1.86±0.28                 | 1.31±0.38                 | 1.31±0.13                | 1.54±0.5                  | 1.67±0.44                 | 1.93±0.74                 | 2.4±0.12                  | 2.1±0.08                  | 2.07±0.13                 | 2.43    | 0.081NS               |
| C18:4n-3    | 2.87±0.34 <sup>a</sup>   | 2.83±0.53 <sup>a</sup>   | 3.37±0.22 <sup>ab</sup>    | 2.55±0.33 <sup>a</sup>    | 2.69±1.24 <sup>a</sup>    | 5.45±0.71 <sup>c</sup>   | 5.05±0.17 <sup>bc</sup>   | 5.73±0.26 <sup>c</sup>    | 4.48±1.53 <sup>abc</sup>  | 2.88±0.6 <sup>a</sup>     | 2.71±0.44 <sup>a</sup>    | 2.51±0.34 <sup>a</sup>    | 9.45    | 0.000***              |
| C20:5n-3    | 16.6±0.6 <sup>bcd</sup>  | 16±0.7 <sup>abcde</sup>  | 16.39±0.79 <sup>bcd</sup>  | 15.5±1.0 <sup>abcde</sup> | 14.8±0.53 <sup>abcd</sup> | 11.9±1.15 <sup>ab</sup>  | 12.56±2.18 <sup>ab</sup>  | 11.23±1.18 <sup>a</sup>   | 14.39±4.57 <sup>abc</sup> | 20.08±0.18 <sup>e</sup>   | 19.7±1.3 <sup>de</sup>    | 18.3±1.57 <sup>cde</sup>  | 8.37    | 0.000***              |
| C22:5n-3    | 1.07±0.31 <sup>ab</sup>  | 0.72±0.42 <sup>ab</sup>  | 0.47±0.31 <sup>a</sup>     | 0.77±0.12 <sup>ab</sup>   | 0.95±0.42 <sup>ab</sup>   | 1.09±0.19 <sup>ab</sup>  | 0.98±0.14 <sup>ab</sup>   | 0.13±0.3 <sup>b</sup>     | 0.95±0.17 <sup>ab</sup>   | 0.55±0.39 <sup>ab</sup>   | 0.76±0.09 <sup>ab</sup>   | 0.87±0.02 <sup>ab</sup>   | 2.22    | 0.05*                 |
| C22:6n-3    | 12.2±0.23 <sup>ab</sup>  | 12.47±0.3 <sup>b</sup>   | 10.26±0.16 <sup>ab</sup>   | 11.35±1.07 <sup>ab</sup>  | 10.58±2.05 <sup>ab</sup>  | 8.84±1.34 <sup>a</sup>   | 8.8±1.2 <sup>a</sup>      | 10.15±0.99 <sup>ab</sup>  | 10.69±2.25 <sup>ab</sup>  | 12.81±0.66 <sup>b</sup>   | 12.9±1.5 <sup>b</sup>     | 12.94±0.4 <sup>ab</sup>   | 4.69    | 0.001***              |
| n-3PUFAs    | 34.7±0.4 <sup>bcd</sup>  | 33.6±0.1 <sup>abcd</sup> | 32.74±0.71 <sup>abc</sup>  | 32.0±0.11 <sup>abc</sup>  | 30.34±1.34 <sup>ab</sup>  | 28.6±0.28 <sup>a</sup>   | 28.9±1.47 <sup>a</sup>    | 30.08±0.15 <sup>ab</sup>  | 32.45±5.06 <sup>abc</sup> | 38.7±0.8 <sup>d</sup>     | 38.2±1.9 <sup>d</sup>     | 36.7±1.5 <sup>cd</sup>    | 11.46   | 0.000***              |
| C18:2n-6    | 0.7±0.11                 | 1.03±0.56                | 1.3±0.36                   | 1.32±0.33                 | 1.34±0.14                 | 1.17±0.26                | 1.09±0.26                 | 1.42±0.26                 | 1.05±0.18                 | 1.11±0.13                 | 1.06±0.38                 | 0.86±0.07                 | 1.56    | 0.175NS               |
| C18:3n-6    | 0.24±0.04                | 0.23±0.1                 | 0.4±0.06                   | 0.42±0.15                 | 0.33±0.1                  | 0.39±0.04                | 0.33±0.05                 | 0.37±0.04                 | 0.35±0.06                 | 0.3±0.09                  | 0.24±0.1                  | 0.28±0.04                 | 2.01    | 0.074NS               |
| C20:2n-6    | 1.03±0.13                | 1.01±0.48                | 1.14±0.39                  | 1.33±0.68                 | 1.6±0.45                  | 1.57±0.53                | 1.56±0.6                  | 2.04±0.14                 | 1.88±0.87                 | 1.34±0.47                 | 1.28±0.20                 | 1.07±0.13                 | 1.45    | 0.216NS               |
| C20:3n-6    | 0.37±0.08 <sup>a</sup>   | 0.39±0.12 <sup>a</sup>   | 0.61±0.05 <sup>ab</sup>    | 0.7±0.07 <sup>ab</sup>    | 0.62±0.23 <sup>ab</sup>   | 0.67±0.06 <sup>ab</sup>  | 0.67±0.05 <sup>ab</sup>   | 0.65±0.11 <sup>ab</sup>   | 0.63±0.11 <sup>ab</sup>   | 0.78±0.1 <sup>b</sup>     | 0.81±0.26 <sup>b</sup>    | 0.34±0.03 <sup>a</sup>    | 4.54    | 0.001***              |
| C20:4n-6    | 8.63±0.83 <sup>b</sup>   | 8.21±1.8 <sup>b</sup>    | 7.27±2.03 <sup>ab</sup>    | 7.14±2.09 <sup>ab</sup>   | 7.75±1.16 <sup>ab</sup>   | 8.14±0.78 <sup>b</sup>   | 8.3±1.96 <sup>b</sup>     | 3.86±1.48 <sup>a</sup>    | 6.9±0.95 <sup>ab</sup>    | 5.35±1.06 <sup>ab</sup>   | 4.79±0.94 <sup>ab</sup>   | 6.37±0.52 <sup>ab</sup>   | 3.53    | 0.005**               |
| C22:3n-6    | 0.49±0.1                 | 0.37±0.1                 | 0.64±0.05                  | 0.63±0.17                 | 0.69±0.15                 | 0.62±0.16                | 0.55±0.08                 | 0.55±0.07                 | 0.65±0.18                 | 0.58±0.22                 | 0.59±0.26                 | 0.47±0.05                 | 1.10    | 0.401NS               |
| C22:2n-6    | 1.21±0.22 <sup>a</sup>   | 1.21±0.24 <sup>a</sup>   | 1.6±0.24 <sup>ab</sup>     | 1.7±0.35 <sup>ab</sup>    | 1.8±0.56 <sup>ab</sup>    | 1.35±0.12 <sup>ab</sup>  | 1.34±0.3 <sup>ab</sup>    | 2.22±0.11 <sup>b</sup>    | 1.82±0.67 <sup>ab</sup>   | 1.44±0.05 <sup>ab</sup>   | 1.2±0.3 <sup>a</sup>      | 1.39±0.34 <sup>ab</sup>   | 2.75    | 0.018*                |
| n-6 PUFAs   | 12.67±0.1 <sup>ab</sup>  | 12.45±0.3 <sup>ab</sup>  | 13.0±1.67 <sup>ab</sup>    | 13.25±1.86 <sup>ab</sup>  | 14.16±1.1 <sup>b</sup>    | 13.91±0.67 <sup>b</sup>  | 13.86±1.1 <sup>b</sup>    | 11.12±1.39 <sup>ab</sup>  | 13.27±2.42 <sup>ab</sup>  | 10.91±0.61 <sup>ab</sup>  | 9.98±0.32 <sup>a</sup>    | 10.78±0.73 <sup>ab</sup>  | 3.87    | 0.003***              |
| Total PUFAs | 47.4±0.25 <sup>cde</sup> | 46.0±0.2 <sup>bcd</sup>  | 45.7±2.25 <sup>abcde</sup> | 45.3±2.0 <sup>abcde</sup> | 44.5±1.44 <sup>abcd</sup> | 42.51±0.86 <sup>ab</sup> | 42.79±0.41 <sup>abc</sup> | 41.2±1.26 <sup>a</sup>    | 45.7±2.7 <sup>abcde</sup> | 49.6±0.21 <sup>e</sup>    | 48.18±2.17 <sup>de</sup>  | 47.47±2.18 <sup>cde</sup> | 7.28    | 0.000***              |
| n.3:n.6     | 2.75±0.16 <sup>abc</sup> | 2.7±0.08 <sup>ab</sup>   | 2.55±0.30 <sup>abc</sup>   | 2.45±0.32 <sup>ab</sup>   | 2.15±0.22 <sup>a</sup>    | 2.06±0.09 <sup>a</sup>   | 2.1±0.28 <sup>a</sup>     | 2.7±0.35 <sup>abc</sup>   | 2.56±0.93 <sup>abc</sup>  | 3.56±0.28 <sup>cd</sup>   | 3.8±0.13 <sup>d</sup>     | 3.4±0.13 <sup>bcd</sup>   | 8.21    | 0.000***              |

Values are mean ± SD of triplicate measurements (n=3) based on the one-way ANOVA. The mean values followed by the different superscript letter in each parameter indicate significant difference at 0.05. If the effects were significant, ANOVA was followed by Tukey test. P-values were given while significance levels were denoted by asterisks (\*<0.05; \*\*<0.01; \*\*\*<0.001; NS-not significant).

**Table S5.** Variation in fatty acid content (% of total fatty acids) of gonad in different gonadal development stages of the green mussel *Perna viridis*

| Fatty acids | Gonadal Development Stages |                          |                          |                         |                          | F-values | Sig. Level<br>P value |
|-------------|----------------------------|--------------------------|--------------------------|-------------------------|--------------------------|----------|-----------------------|
|             | Resting                    | Development              | Mature                   | Spawning                | Spent                    |          |                       |
| C14:0       | 3.17±0.48 <sup>ab</sup>    | 2.95±0.16 <sup>a</sup>   | 3.18±0.21 <sup>ab</sup>  | 2.96±0.14 <sup>a</sup>  | 3.51±0.17 <sup>b</sup>   | 2.88     | 0.03**                |
| C15:0       | 0.59±0.09                  | 0.64±0.07                | 0.65±.12                 | 0.64±0.09               | 0.62±0.13                | 0.51     | 0.728NS               |
| C16:0       | 16.62±1.34 <sup>a</sup>    | 19.47±0.81 <sup>b</sup>  | 25.6±0.67 <sup>d</sup>   | 23.9±0.39 <sup>c</sup>  | 16.66±0.74 <sup>a</sup>  | 127.81   | 0.000***              |
| C17:0       | 1.47±0.33 <sup>b</sup>     | 1.03±0.14 <sup>a</sup>   | 0.9±0.1 <sup>a</sup>     | 0.98±0.04 <sup>a</sup>  | 1.41±0.11 <sup>b</sup>   | 11.37    | 0.000***              |
| C18:0       | 3.92±0.86 <sup>c</sup>     | 3.18±0.53 <sup>abc</sup> | 2.4±0.38 <sup>a</sup>    | 2.88±0.2 <sup>ab</sup>  | 3.57±0.09 <sup>bc</sup>  | 7.95     | 0.000***              |
| C20:0       | 0.36±0.12                  | 0.36±0.07                | 0.32±0.05                | 0.34±0.06               | 0.38±0.08 <sup>b</sup>   | 0.39     | 0.816 NS              |
| C24:0       | 0.33±0.09 <sup>ab</sup>    | 0.44±0.08 <sup>b</sup>   | 0.36±0.07 <sup>ab</sup>  | 0.34±0.07 <sup>ab</sup> | 0.28±0.03 <sup>a</sup>   | 3.89     | 0.011**               |
| Total SFAs  | 26.46±1.24 <sup>a</sup>    | 28.08±0.64 <sup>b</sup>  | 33.41±0.58 <sup>c</sup>  | 32.07±0.44 <sup>c</sup> | 26.43±0.82 <sup>a</sup>  | 90.30    | 0.000***              |
| C14:1       | 0.35±0.09                  | 0.28±0.04                | 0.23±0.05                | 0.31±0.08               | 0.33±0.07                | 3.01     | 0.053 NS              |
| C16:1       | 16.25±0.46 <sup>d</sup>    | 11.28±0.33 <sup>b</sup>  | 10.05±0.3 <sup>a</sup>   | 10.05±0.34 <sup>a</sup> | 15.5±0.49 <sup>c</sup>   | 436.06   | 0.000***              |
| C17:1       | 2.99±0.39 <sup>c</sup>     | 2.34±0.22 <sup>ab</sup>  | 2.26±0.38 <sup>a</sup>   | 2.9±0.34 <sup>c</sup>   | 2.82±0.28 <sup>bc</sup>  | 7.39     | 0.000***              |
| C18:1n-9    | 5.86±0.51 <sup>c</sup>     | 4.3±0.44 <sup>b</sup>    | 3.36±0.39 <sup>a</sup>   | 3.67±0.62 <sup>ab</sup> | 5.52±0.23 <sup>c</sup>   | 42.07    | 0.000***              |
| C18:1n-7    | 2.82±0.16 <sup>b</sup>     | 2.12±0.23 <sup>a</sup>   | 2.08±0.25 <sup>a</sup>   | 2.55±0.29 <sup>b</sup>  | 2.5±0.17 <sup>b</sup>    | 17.91    | 0.000***              |
| C20:1n-9    | 2.7±0.43 <sup>c</sup>      | 2.12±0.25 <sup>ab</sup>  | 1.89±0.31 <sup>a</sup>   | 1.86±0.33 <sup>a</sup>  | 2.52±0.37 <sup>bc</sup>  | 8.87     | 0.000***              |
| Total MUFAs | 30.98±0.6 <sup>e</sup>     | 22.43±0.7 <sup>c</sup>   | 19.87±0.2 <sup>a</sup>   | 21.34±0.23 <sup>b</sup> | 29.18±0.26 <sup>d</sup>  | 804.49   | 0.000***              |
| C18:3n-3    | 1.5±0.49 <sup>a</sup>      | 2.21±0.19 <sup>b</sup>   | 2.07±0.36 <sup>ab</sup>  | 1.93±0.43 <sup>ab</sup> | 1.75±0.3 <sup>ab</sup>   | 4.49     | 0.006**               |
| C18:4n-3    | 5.29±0.58 <sup>a</sup>     | 2.7±0.5 <sup>b</sup>     | 2.8±0.23 <sup>b</sup>    | 2.95±0.59 <sup>b</sup>  | 2.5±0.52 <sup>b</sup>    | 48.53    | 0.000***              |
| C20:5n-3    | 12.1±1.6 <sup>a</sup>      | 19.97±0.74 <sup>c</sup>  | 17.26±1.0 <sup>b</sup>   | 16.02±0.86 <sup>b</sup> | 15.49±0.72 <sup>b</sup>  | 53.67    | 0.000***              |
| C22:5n-3    | 1.13±0.23 <sup>b</sup>     | 0.69±0.27 <sup>a</sup>   | 0.95±0.24 <sup>ab</sup>  | 0.63±0.37 <sup>a</sup>  | 0.7±0.06 <sup>a</sup>    | 6.19     | 0.001***              |
| C22:6n-3    | 9.2±1.09 <sup>a</sup>      | 13.21±0.63 <sup>c</sup>  | 12.22±0.57 <sup>bc</sup> | 11.64±1.17 <sup>b</sup> | 11.17±0.87 <sup>b</sup>  | 23.99    | 0.000***              |
| n-3 PUFAs   | 29.23±0.89 <sup>a</sup>    | 38.78±0.63 <sup>e</sup>  | 35.3±0.69 <sup>d</sup>   | 33.18±0.61 <sup>c</sup> | 31.6±0.61 <sup>b</sup>   | 205.95   | 0.000***              |
| C18:2n-6    | 1.24±0.25 <sup>b</sup>     | 1.09±0.18 <sup>ab</sup>  | 0.74±0.12 <sup>a</sup>   | 1.16±0.44 <sup>ab</sup> | 1.3±0.25 <sup>b</sup>    | 4.32     | 0.007**               |
| C18:3n-6    | 0.35±0.06 <sup>a</sup>     | 0.31±0.05 <sup>a</sup>   | 0.23±0.06 <sup>b</sup>   | 0.36±0.16 <sup>b</sup>  | 0.35±0.09 <sup>ab</sup>  | 2.82     | 0.061NS               |
| C20:2n-6    | 1.86±0.48 <sup>b</sup>     | 1.23±0.35 <sup>a</sup>   | 1.07±0.11 <sup>a</sup>   | 0.97±0.32 <sup>a</sup>  | 1.51±0.47 <sup>ab</sup>  | 7.34     | 0.000***              |
| C20:3n-6    | 0.67±0.1 <sup>bc</sup>     | 0.76±0.21 <sup>c</sup>   | 0.38±0.1 <sup>a</sup>    | 0.53±0.18 <sup>ab</sup> | 0.59±0.1 <sup>abc</sup>  | 6.62     | 0.001***              |
| C20:4n-6    | 6.85±2.19 <sup>ab</sup>    | 5.32±1.08 <sup>a</sup>   | 7.35±1.52 <sup>ab</sup>  | 8.42±1.21 <sup>b</sup>  | 6.83±1.79 <sup>ab</sup>  | 2.77     | 0.045**               |
| C22:3n-6    | 0.59±0.11 <sup>ab</sup>    | 0.63±0.17 <sup>ab</sup>  | 0.45±0.1 <sup>a</sup>    | 0.48±0.17 <sup>ab</sup> | 0.68±0.12 <sup>b</sup>   | 3.09     | 0.03**                |
| C22:2n-6    | 1.79±0.5                   | 1.38±0.22                | 1.2±0.14                 | 1.51±0.43               | 1.52±0.21                | 2.91     | 0.053NS               |
| n-6 PUFAs   | 13.33±1.6 <sup>b</sup>     | 10.72±0.64 <sup>a</sup>  | 11.42±1.46 <sup>ab</sup> | 13.42±1.22 <sup>b</sup> | 12.78±1.61 <sup>ab</sup> | 5.61     | 0.002**               |
| Total PUFAs | 42.57±1.21 <sup>a</sup>    | 49.5±0.47 <sup>d</sup>   | 46.72±0.78 <sup>c</sup>  | 46.59±0.65 <sup>c</sup> | 44.39±1.04 <sup>b</sup>  | 68.40    | 0.000***              |
| n-3:n-6     | 2.23±0.36 <sup>a</sup>     | 3.63±0.26 <sup>b</sup>   | 3.14±0.46 <sup>b</sup>   | 2.49±0.26 <sup>a</sup>  | 2.5±0.34 <sup>a</sup>    | 21.28    | 0.000***              |

Values are mean ± SD of the gonadal fatty acids. The mean values followed by the different superscript letter in each parameter indicate significant difference at 0.05. If the effects were significant, ANOVA was followed by Tukey test. P-values were given while significance levels were denoted by asterisks (\*<0.05; \*\*<0.01; \*\*\*<0.001; NS-not significant).

**Table S6.** Principal component analysis of the water quality parameters of the green mussel collection sites. Eigenvalues, explained and cumulative variance, loadings of the variables for the first five PCs.

| Water Quality Parameters  | Principal Components |        |        |
|---------------------------|----------------------|--------|--------|
|                           | PC1                  | PC2    | PC3    |
| <i>Variance explained</i> |                      |        |        |
| Eigenvalues               | 4.47                 | 3.09   | 1.55   |
| % of variance             | 40.68                | 28.10  | 14.05  |
| Cumulative %              | 40.68                | 68.78  | 82.83  |
| <i>Factor loadings</i>    |                      |        |        |
| Temperature               | -0.731               | 0.586  | -0.062 |
| Current speed             | -0.460               | 0.842  | 0.193  |
| Transparency              | -0.794               | -0.487 | 0.175  |
| pH                        | 0.336                | -0.066 | 0.767  |
| DO                        | 0.590                | -0.457 | -0.204 |
| Salinity                  | 0.475                | -0.802 | -0.230 |
| Nitrate-nitrogen          | 0.376                | 0.392  | 0.506  |
| Phosphate                 | 0.865                | 0.349  | -0.082 |
| Ammonia-nitrogen          | -0.444               | 0.391  | -0.688 |
| Chlorophyll-a             | 0.824                | 0.496  | -0.177 |
| Total plankton            | 0.804                | 0.520  | -0.156 |

**Table S7.** Principal component analysis of different month-wise ingested gut plankton of green mussel *Perna viridis*. Eigenvalues, explained and cumulative variance, loadings of the variables for the first five PCs.

|                                  | Principal Components |        |        |
|----------------------------------|----------------------|--------|--------|
|                                  | PC1                  | PC2    | PC3    |
| <b><i>Variance explained</i></b> |                      |        |        |
| Eigenvalues                      | 3.58                 | 1.76   | 1.05   |
| % of variance                    | 44.79                | 22.04  | 13.07  |
| Cumulative %                     | 44.79                | 66.83  | 79.90  |
| <b><i>Factor loadings</i></b>    |                      |        |        |
| Bacillariophyceae                | 0.783                | -0.343 | 0.210  |
| Chlorophyceae                    | 0.034                | 0.899  | -0.089 |
| Cyanophyceae                     | 0.328                | 0.842  | -0.206 |
| Dinophyceae                      | 0.074                | 0.249  | 0.884  |
| Pyrophyceae                      | 0.686                | -0.191 | -0.330 |
| Phytoplankton                    | 0.949                | 0.112  | 0.149  |
| Zooplankton                      | 0.705                | -0.117 | -0.188 |
| Total plankton                   | 0.994                | 0.052  | 0.059  |



**Table S8.** Principal component analysis of different gonadal stage-wise ingested gut plankton of green mussel *Perna viridis*. Eigenvalues, explained and cumulative variance, loadings of the variables for the first five PCs.

|                           | Principal Components |        |        |
|---------------------------|----------------------|--------|--------|
|                           | PC1                  | PC2    | PC3    |
| <i>Variance explained</i> |                      |        |        |
| Eigenvalues               | 3.60                 | 1.75   | 1.06   |
| % of variance             | 45.01                | 21.92  | 13.31  |
| Cumulative %              | 45.01                | 66.93  | 80.25  |
| Bacillariophyceae         | 0.792                | -0.327 | 0.226  |
| Chlorophyceae             | 0.037                | 0.902  | -0.082 |
| Cyanophyceae              | 0.331                | 0.842  | -0.202 |
| Dinophyceae               | 0.083                | 0.226  | 0.879  |
| Pyrophyceae               | 0.682                | -0.205 | -0.343 |
| Phytoplankton             | 0.950                | 0.113  | 0.158  |
| Zooplankton               | 0.708                | -0.127 | -0.218 |
| Total plankton            | 0.994                | 0.051  | 0.057  |

**Table S9.** Principal component analysis of different month-wise gonadal fatty acids contents of green mussel *Perna viridis*. Eigenvalues, explained and cumulative variance, loadings of the variables for the first five PCs.

| Gonadal fatty acids       | Principal Components |        |        |        |        |
|---------------------------|----------------------|--------|--------|--------|--------|
|                           | PC1                  | PC2    | PC3    | PC4    | PC5    |
| <b>Variance explained</b> |                      |        |        |        |        |
| Eigenvalues               | 10.91                | 3.13   | 1.63   | 1.52   | 0.99   |
| % of variance             | 51.96                | 14.91  | 7.74   | 7.23   | 4.71   |
| Cumulative %              | 51.96                | 66.87  | 74.61  | 81.84  | 86.55  |
| <b>Factor loadings</b>    |                      |        |        |        |        |
| C14:0                     | 0.262                | 0.047  | -0.062 | -0.626 | 0.621  |
| C16:0                     | -0.817               | -0.405 | -0.333 | -0.065 | -0.160 |
| C17:0                     | 0.782                | 0.353  | -0.202 | 0.235  | 0.228  |
| C18:0                     | 0.680                | 0.407  | -0.155 | 0.443  | 0.143  |
| Total SFAs                | -0.757               | -0.359 | -0.487 | -0.028 | -0.068 |
| C16:1                     | 0.943                | 0.181  | 0.070  | -0.107 | 0.064  |
| C18:1n-9                  | 0.870                | 0.259  | 0.141  | -0.256 | 0.000  |
| C18:1n-7                  | 0.765                | -0.236 | 0.043  | 0.087  | -0.136 |
| C20:1n-9                  | 0.687                | 0.057  | 0.293  | -0.430 | -0.255 |
| Total MUFAs               | 0.965                | 0.143  | 0.112  | -0.131 | 0.003  |
| C18:4n-3                  | 0.774                | -0.014 | -0.301 | 0.011  | -0.436 |
| C20:5n-3                  | -0.852               | 0.343  | 0.260  | 0.022  | 0.051  |
| C22:5n-3                  | 0.484                | -0.010 | -0.498 | -0.194 | -0.031 |
| C22:6n-3                  | -0.821               | 0.239  | 0.035  | -0.014 | 0.224  |
| n-3 PUFAs                 | -0.885               | 0.423  | 0.101  | 0.039  | -0.022 |
| C20:2n-6                  | 0.282                | 0.552  | 0.437  | 0.166  | -0.265 |
| C20:4n-6                  | 0.026                | -0.894 | 0.354  | 0.076  | 0.086  |
| C22:2n-6                  | 0.527                | 0.212  | -0.345 | 0.556  | 0.212  |
| n-6 PUFAs                 | 0.518                | -0.671 | 0.325  | 0.332  | 0.156  |
| Total PUFAs               | -0.849               | 0.143  | 0.335  | 0.257  | 0.068  |
| n-3:n-6                   | -0.729               | 0.628  | -0.118 | -0.157 | -0.131 |

**Table S10.** Principal component analysis of different gonad development stage-wise fatty acids contents of green mussel *Perna viridis*. Eigenvalues, explained and cumulative variance, loadings of the variables for the first five PCs.

| Gonadal fatty acids       | Principal Components |        |        |        |        |
|---------------------------|----------------------|--------|--------|--------|--------|
|                           | PC1                  | PC2    | PC3    | PC4    | PC5    |
| <b>Variance explained</b> |                      |        |        |        |        |
| Eigenvalues               | 12.30                | 3.57   | 2.04   | 1.66   | 1.14   |
| % of variance             | 47.30                | 13.73  | 7.83   | 6.37   | 4.39   |
| Cumulative %              | 47.30                | 61.03  | 68.86  | 75.22  | 79.62  |
| <b>Factor loadings</b>    |                      |        |        |        |        |
| C14:0                     | 0.273                | 0.036  | -0.236 | 0.488  | -0.622 |
| C16:0                     | -0.819               | -0.394 | -0.287 | -0.132 | -0.028 |
| C17:0                     | 0.794                | 0.310  | -0.182 | -0.242 | 0.022  |
| C18:0                     | 0.680                | 0.360  | -0.056 | -0.336 | 0.249  |
| C24:0                     | -0.414               | 0.072  | 0.287  | 0.423  | 0.413  |
| Total SFAs                | -0.759               | -0.363 | -0.417 | -0.201 | -0.036 |
| C14:1                     | 0.940                | 0.146  | 0.022  | 0.129  | 0.024  |
| C16:1                     | 0.587                | -0.155 | 0.220  | -0.439 | -0.133 |
| C18:1n-9                  | 0.874                | 0.217  | -0.044 | 0.258  | -0.009 |
| C18:1n-7                  | 0.766                | -0.235 | 0.145  | -0.210 | -0.035 |
| C20:1n-9                  | 0.678                | 0.043  | 0.107  | 0.487  | 0.080  |
| Total MUFAs               | 0.965                | 0.109  | 0.052  | 0.135  | 0.006  |
| C18:3n-3                  | -0.625               | 0.193  | 0.265  | -0.344 | 0.174  |
| C18:4n-3                  | 0.754                | -0.067 | -0.227 | -0.056 | 0.468  |
| C20:5n-3                  | -0.831               | 0.390  | 0.170  | 0.042  | -0.155 |
| C22:5n-3                  | 0.490                | -0.058 | -0.453 | 0.301  | 0.184  |
| C22:6n-3                  | -0.816               | 0.250  | -0.004 | 0.085  | -0.049 |
| n-3 PUFAs                 | -0.875               | 0.453  | 0.056  | 0.040  | 0.051  |
| C18:2n-6                  | 0.514                | 0.440  | 0.001  | -0.336 | -0.410 |
| C20:2n-6                  | 0.715                | 0.393  | -0.241 | -0.189 | 0.022  |
| C20:3n-6                  | 0.302                | 0.587  | 0.429  | -0.068 | -0.023 |
| C20:4n-6                  | -0.010               | -0.879 | 0.383  | 0.103  | -0.002 |
| C22:3n-6                  | 0.286                | 0.363  | 0.608  | 0.176  | -0.042 |
| n-6 PUFAs                 | 0.501                | -0.631 | 0.467  | -0.110 | -0.064 |
| Total PUFAs               | -0.846               | 0.207  | 0.364  | -0.016 | 0.028  |
| n-3:n-6                   | -0.712               | 0.620  | -0.226 | 0.068  | 0.078  |

**Table S11.** Principal Component Analysis (PCA): relationships among the environmental factors, ingested gut plankton, lipids and Fatty acid content of gonad and GSI of green mussel *Perna viridis*. Eigenvalues, explained and cumulative variance, loadings of the variables for the first five PCs.

| Gonadal fatty acids       | Principal Components |        |        |
|---------------------------|----------------------|--------|--------|
|                           | PC1                  | PC2    | PC3    |
| <b>Variance explained</b> |                      |        |        |
| Eigenvalues               | 10.29                | 3.43   | 2.12   |
| % of variance             | 51.47                | 17.17  | 10.58  |
| Cumulative %              | 51.47                | 68.64  | 79.22  |
| <b>Factor loadings</b>    |                      |        |        |
| Temperature               | -0.806               | 0.474  | -0.224 |
| Current speed             | -0.464               | 0.801  | -0.185 |
| Transparency              | -0.687               | -0.380 | 0.439  |
| DO                        | 0.514                | -0.619 | -0.296 |
| Salinity                  | 0.435                | -0.749 | 0.245  |
| Phosphate-phosphorus      | 0.795                | 0.331  | -0.252 |
| Chlorophyll-a             | 0.692                | 0.418  | -0.368 |
| Water planktons           | 0.704                | 0.450  | -0.355 |
| GSI                       | 0.915                | -0.299 | -0.100 |
| Gut Bacillariophyceae     | 0.751                | 0.186  | 0.555  |
| Gut phytoplanktons        | 0.704                | 0.267  | 0.575  |
| Gut zooplanktons          | 0.584                | 0.357  | 0.462  |
| Gut planktons             | 0.717                | 0.312  | 0.581  |
| Gonad SFAs                | 0.603                | -0.462 | -0.302 |
| Gonad MUFAs               | -0.820               | 0.384  | 0.226  |
| Gonad n-3 PUFAs           | 0.870                | 0.036  | -0.089 |
| Gonad n-6 PUFAs           | -0.621               | -0.338 | 0.089  |
| Gonad PUFAs               | 0.764                | -0.163 | -0.063 |
| Gonad n-3:n-6             | 0.792                | 0.257  | -0.058 |
| Gonad total lipid         | 0.869                | 0.060  | -0.044 |
